# Supplementary material for: Change of the kinetics of inclusion in cucurbit[7]uril upon hydrogenation and methylation of palmatine
Source: Royal Society of Chemistry journal article supplement (doi:10.1039/c8cp07231k), 2019-01-01
Supplement: c8cp07231k1.pdf [file c8cp07231k1.pdf]

## Supporting Information

### **Change of the kinetics of inclusion in cucurbit[7]uril upon hydrogenation and methylation of palmatine**

**Zsombor Miskolczy,<sup>a</sup> Mónika Megyesi,<sup>a</sup> Orsolya Toke<sup>b</sup> and László Biczók<sup>\*a</sup>**

*<sup>a</sup>Institute of Materials and Environmental Chemistry, Research Centre for Natural Sciences,  
Hungarian Academy of Sciences, P.O. Box 286, 1519 Budapest, Hungary*

*<sup>b</sup>Laboratory for NMR Spectroscopy, Research Centre for Natural Sciences, Hungarian  
Academy of Sciences, P.O. Box 286, 1519 Budapest, Hungary*

---

\* Corresponding author. E-mail: biczok.laszlo@tkk.mta.hu

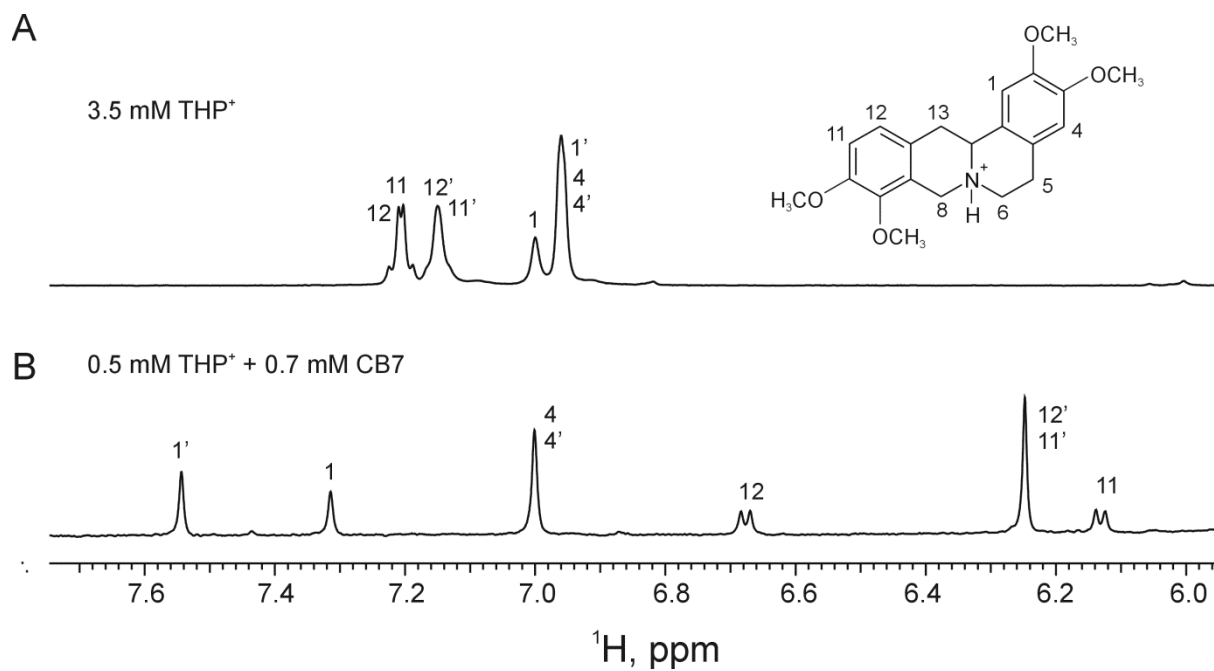

**Figure S1** Aromatic proton region of the  $^1\text{H}$  NMR spectra of THP<sup>+</sup> (A) in the absence of CB7, (B) 1:1.4 [THP<sup>+</sup>]:[CB7] molar ratio in 0.1 mM DCl D<sub>2</sub>O solutions at 298 K. The two conformers of THP<sup>+</sup> are marked with and without primes.

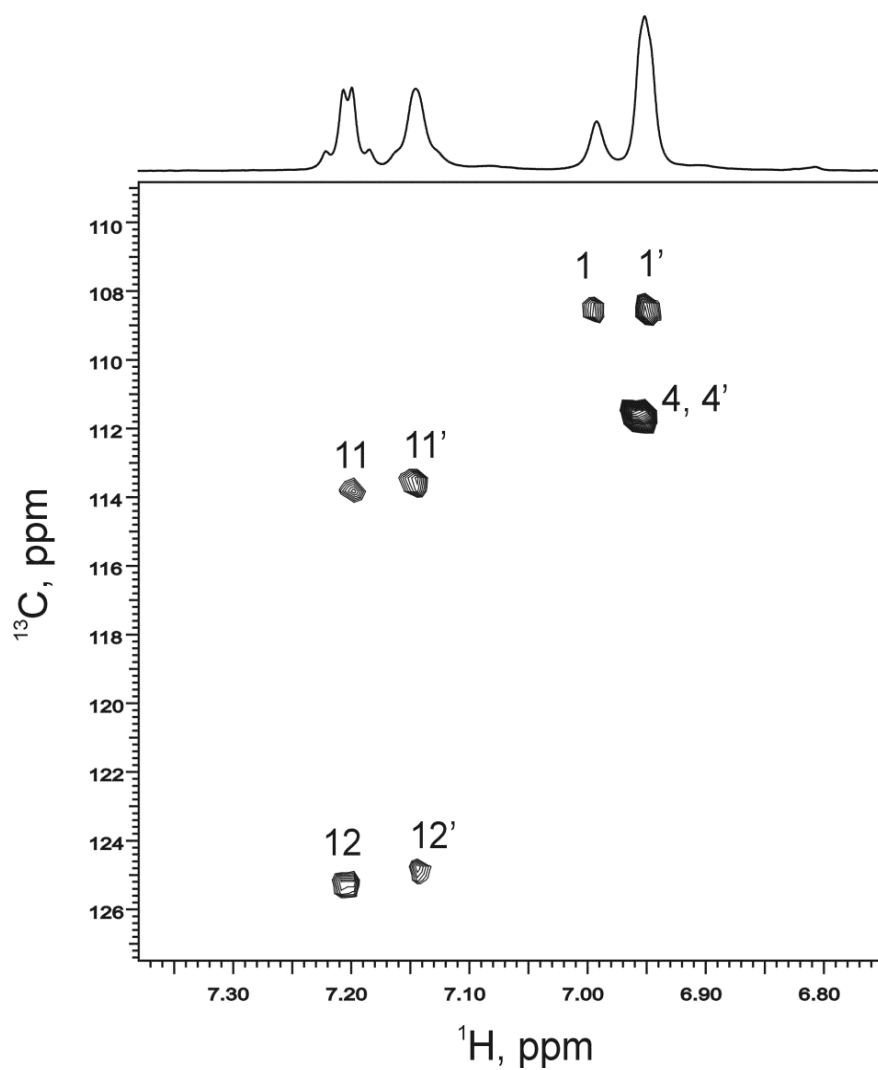

**Figure S2** Aromatic region of  $^1\text{H}$ - $^{13}\text{C}$  HSQC NMR spectrum of  $\text{THP}^+$  in 0.1 mM DCl  $\text{D}_2\text{O}$  solution at 298 K. The two conformers of  $\text{THP}^+$  are marked with and without primes.

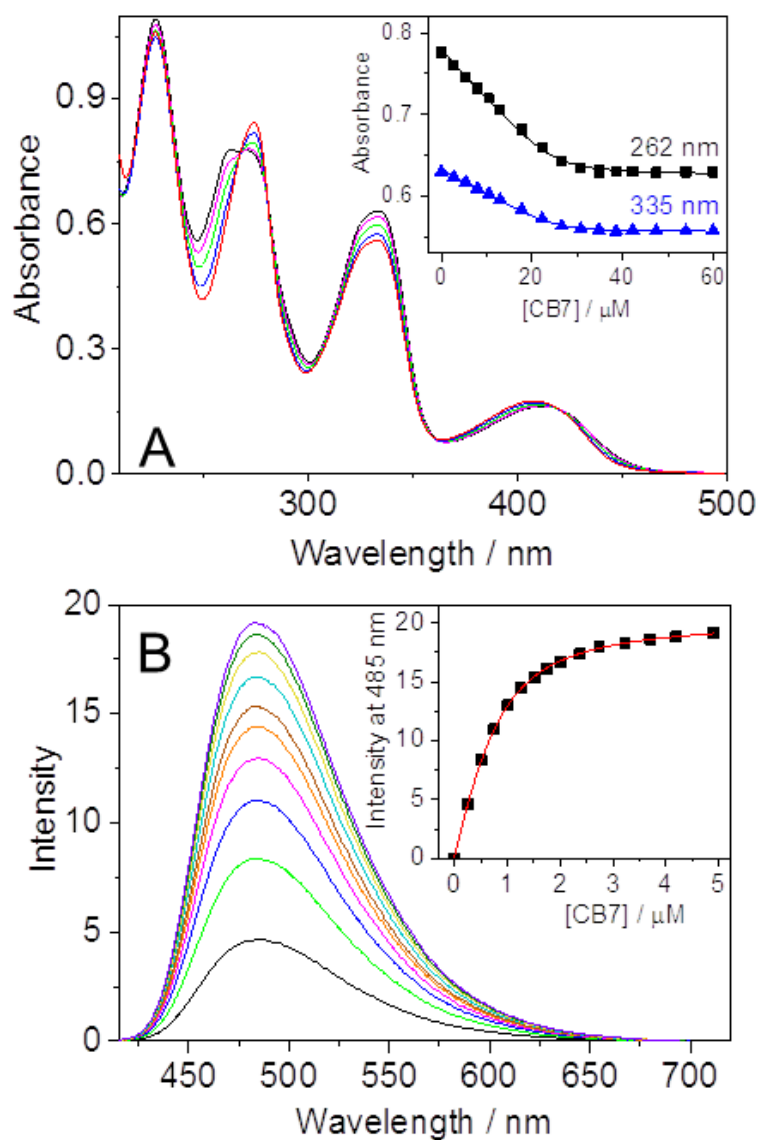

**Figure S3** (A) Effect of 0, 5.4, 13, 22, and 60 μM CB7 addition on the absorption spectrum of 28.4 μM DHC<sup>+</sup> in water. Inset: absorbance change at 262 and 335 nm. (B) Alteration of the fluorescence spectrum of 0.75 μM DHC<sup>+</sup> upon increase of CB7 concentration in the 0.25 – 4.9 μM range (excitation at 335 nm). Inset: rise of the fluorescence intensity at 485 nm with CB7 concentration.
